# Supplementary material for: Nonlinear optical and spectroscopic properties, thermal analysis, and hemolytic capacity evaluation of quinoline-1,3-benzodioxole chalcone
Source: Royal Society of Chemistry journal article supplement (doi:10.1039/d4ra00820k), 2024-01-01
Supplement: d4ra00820k1.pdf [file d4ra00820k1.pdf]

## Support information

# Nonlinear Optical and spectroscopic properties, thermal analysis, and hemolytic Capacity Evaluation of Quinoline-1,3-Benzodioxole chalcone.

Efraín Polo-Cuadrado<sup>a</sup>, Edison Osorio<sup>b</sup>, Karen Acosta-Quiroga<sup>c</sup>, Paola Andrea Camargo-Ayala<sup>d</sup>, Iván Brito<sup>e</sup>, Jany Rodríguez<sup>f</sup>, Joel B. Alderete<sup>g</sup>, Oscar Forero-Doria<sup>h</sup>, Edgard Fabián Blanco-Acuña<sup>i</sup>, Margarita Gutiérrez<sup>j\*</sup>

<sup>a</sup> Universidad de Concepción, Fac. Ciencias Químicas, Depto. Química Orgánica.

<sup>b</sup> Facultad de Ciencias Naturales y Matemáticas, Universidad de Ibagué, Carrera 22 Calle 67, Ibagué 730001, Colombia.

<sup>c</sup> Doctorado en Química, Departamento de Química Orgánica y Físicoquímica, Universidad de Chile, Santiago, Chile.

<sup>d</sup> Departamento de Ciencias Básicas Biomédicas, Facultad de Ciencias de la Salud, Universidad de Talca, Talca, Chile.

<sup>e</sup> Departamento de Química, Facultad de Ciencias Básicas, Universidad de Antofagasta, Avda, Universidad de Antofagasta, Campus Coloso, Antofagasta 02800, Chile.

<sup>f</sup> Doctorado en Ciencias Mención I + D de Productos Bioactivos, Instituto de Química de Recursos Naturales, Universidad de Talca, Casilla 747, Talca 3460000, Chile.

<sup>g</sup> Instituto de Química de Recursos Naturales (IQRN), Universidad de Talca, Avenida Lircay S/N, Casilla 747, Talca, Chile.

<sup>h</sup> Departamento de Ciencias Básicas, Facultad de Ciencias, Universidad Santo Tomás, Talca 3460000, Chile.

<sup>i</sup> Grupo de Investigación en Ciencias Básicas (NÚCLEO), Facultad de Ciencias e Ingeniería, Universidad de Boyacá, 150003, Tunja, Boyacá, Colombia.

<sup>j</sup> Laboratorio Síntesis Orgánica y Actividad Biológica (LSO-Act-Bio), Instituto de Química de Recursos Naturales, Universidad de Talca, Casilla 747, Talca 3460000, Chile

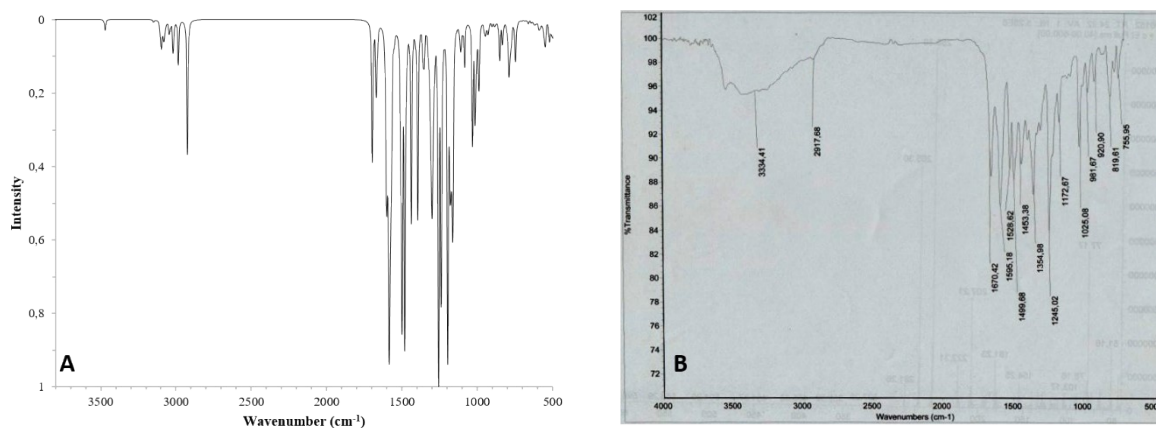

Figure S1. (A) Theoretical and (B) experimental IR spectra of compound 5.

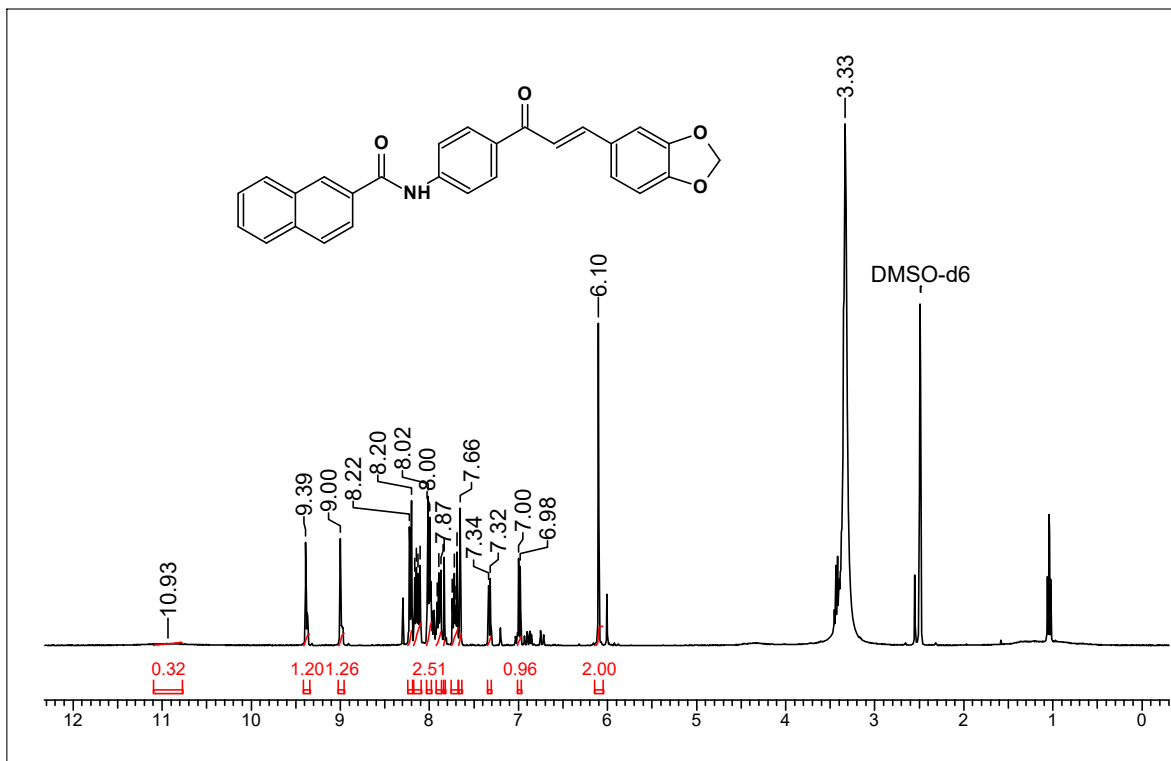

Figure S2. <sup>1</sup>H NMR spectrum at 400 MHz in DMSO-*d*<sub>6</sub> of compound 5.

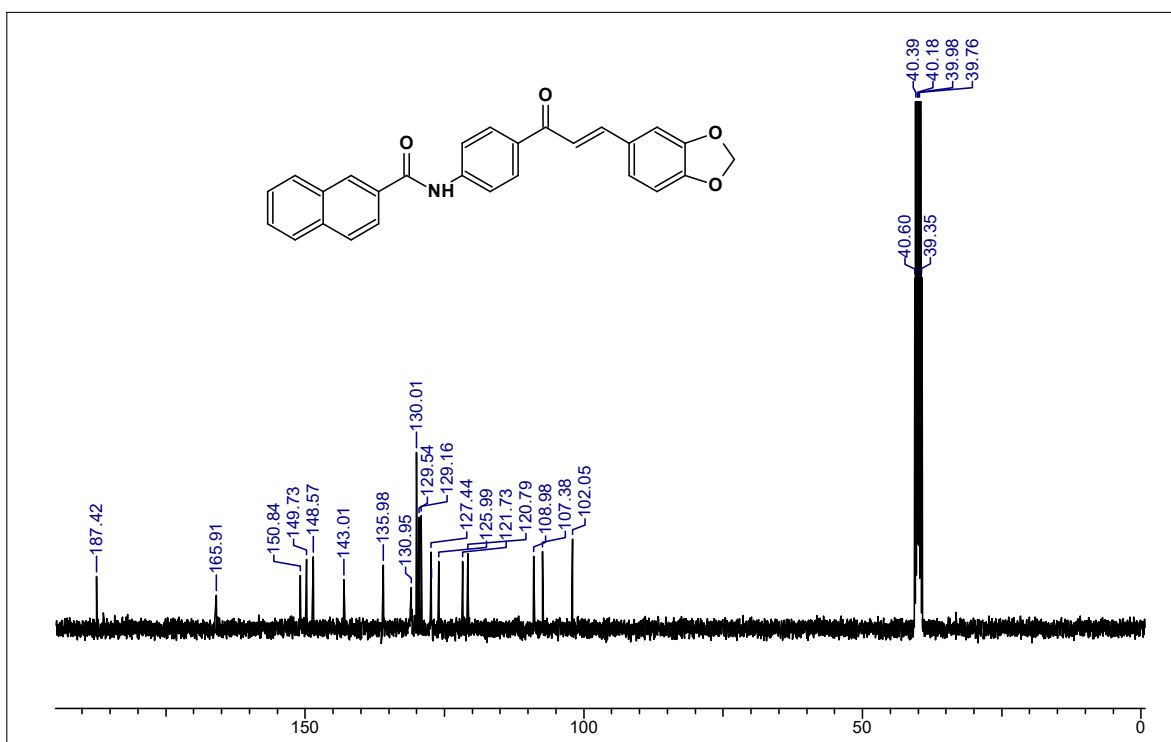

**Figure S3.**  $^{13}\text{C}$  NMR spectrum at 100 MHz in  $\text{DMSO-}d_6$  of compound **5**.

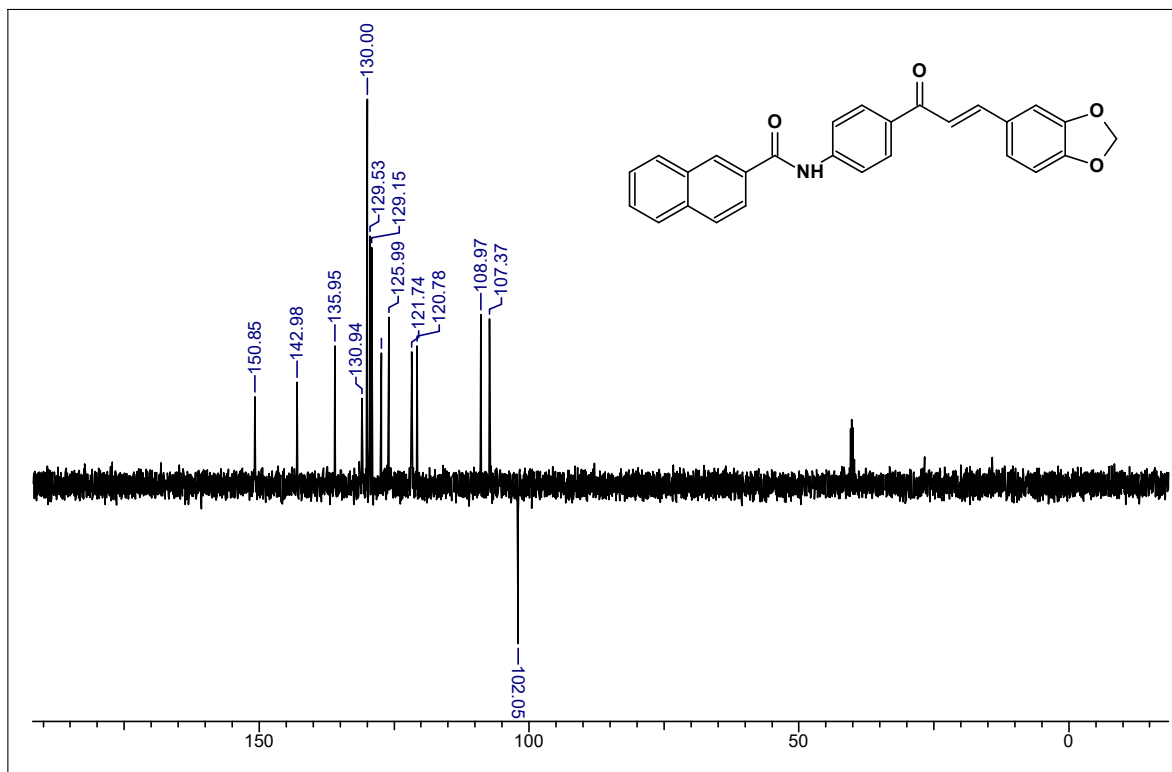

**Figure S4.**  $^{13}\text{C}$  NMR-DEPT-135 spectrum at 100 MHz in  $\text{DMSO-}d_6$  of compound **5**.
